# Supplementary material for: Alarmone Ap4A is elevated by aminoglycoside antibiotics and enhances their bactericidal activity
Source: PubMed Central journal article supplement — Proc Natl Acad Sci U S A. 2019 Apr 19;116(19):9578–85. doi: 10.1073/pnas.1822026116 (PMC6511005; doi:10.1073/pnas.1822026116), 2019-04-19
Supplement: pnas.1822026116.sapp.pdf [file pnas.1822026116.sapp.pdf]

## Supplementary Information for

### **Alarmon Ap4A is elevated by aminoglycoside antibiotics and enhance their bactericidal activity**

Xia Ji<sup>a</sup>, Jin Zou<sup>a, 1</sup>, Haibo Peng<sup>a, 1</sup>, Anne-Sophie Stolle<sup>b</sup>, Ruiqiang Xie<sup>a</sup>, Hongjie Zhang<sup>a</sup>,  
Bo Peng<sup>c,d</sup>, John J. Mekalanos<sup>b, 2</sup>, and Jun Zheng<sup>a, e, 2</sup>

#### **Affiliations:**

<sup>a</sup> Faculty of Health Sciences, University of Macau, Macau SAR, China;

<sup>b</sup> Department of Microbiology and Immunobiology, Harvard Medical School, Boston, MA 02115;

<sup>c</sup> School of Life Sciences, Sun Yat-sen University, Guangzhou 510006, China;

<sup>d</sup> Laboratory for Marine Biology and Biotechnology, Qingdao National Laboratory for Marine Science and Technology, Qingdao 266071, China;

<sup>e</sup> Institute of Translational Medicine, University of Macau, Macau SAR, China.

<sup>2</sup> To whom corresponding should be addressed:

Email: [junzheng@um.edu.mo](mailto:junzheng@um.edu.mo), or [john\\_mekalanos@hms.harvard.edu](mailto:john_mekalanos@hms.harvard.edu)

#### **This PDF file includes:**

Supplementary text

Figs. S1 to S5

Tables S1 to S4

**SUPPLEMENTARY FIGURES and TABLES**

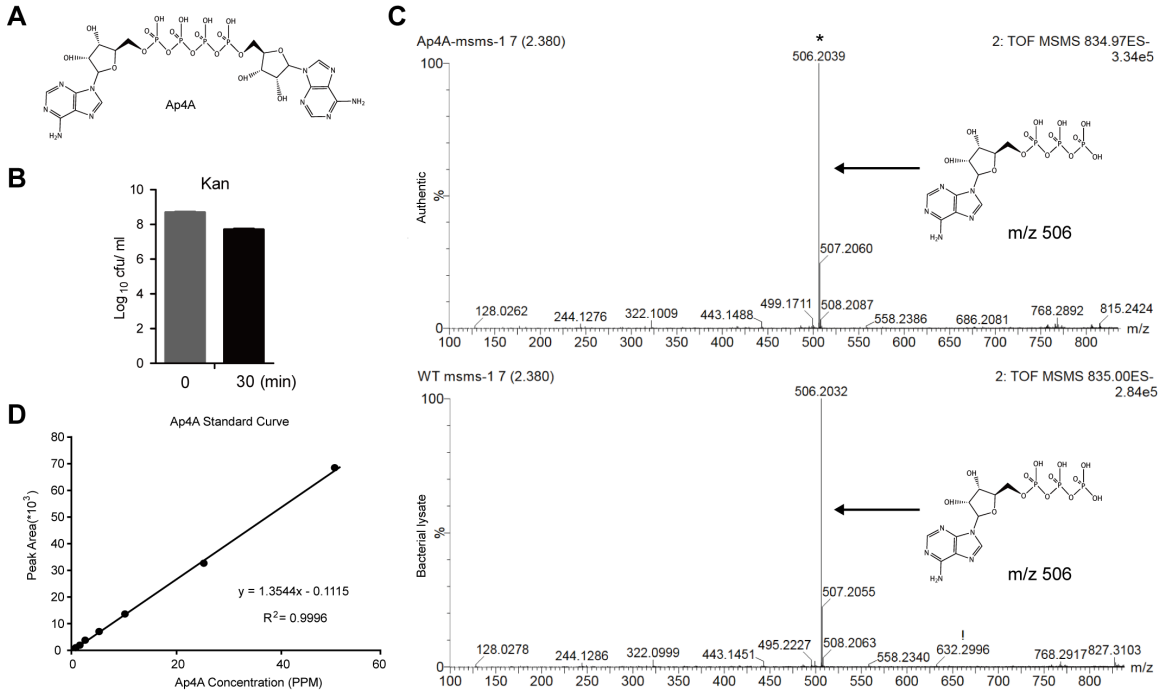

**Fig. S1. Characterization of Ap4A.** (A) Chemical structure of diadenosine tetraphosphate (Ap4A). (B) Survival of *E. coli* WT upon 100 µg/ml kanamycin treatment for 30 min. (C) The tandem mass spectrometry (MS/MS) fragmentation of authentic Ap4A (upper panel) and the identified ion (m/z=835.0794) in the lysate of bacteria treated with 100 µg/ml kanamycin (lower panel) produced the same corresponding ion at m/z = 506. The predicted chemical structure corresponding to m/z= 506 from Ap4A is shown. (D) The standard curve built with authentic Ap4A by UPLC/ESI-Q-TOF/MS for intracellular Ap4A quantification.

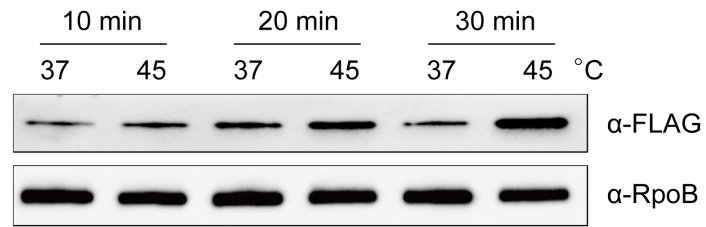

**Fig. S2. Heat-shock stress induces the expression of LysU.** Chromosomally expressed LysU was tagged with FLAG epitope in *lysU::flag* and the expression of the fusion protein was examined with anti-FLAG antibody. The expression of LysU was shown to be induced by heat-shock stress as a control for Fig. 1C. *lysU::flag* was treated at 45°C for 10, 20 and 30 min before protein extraction.

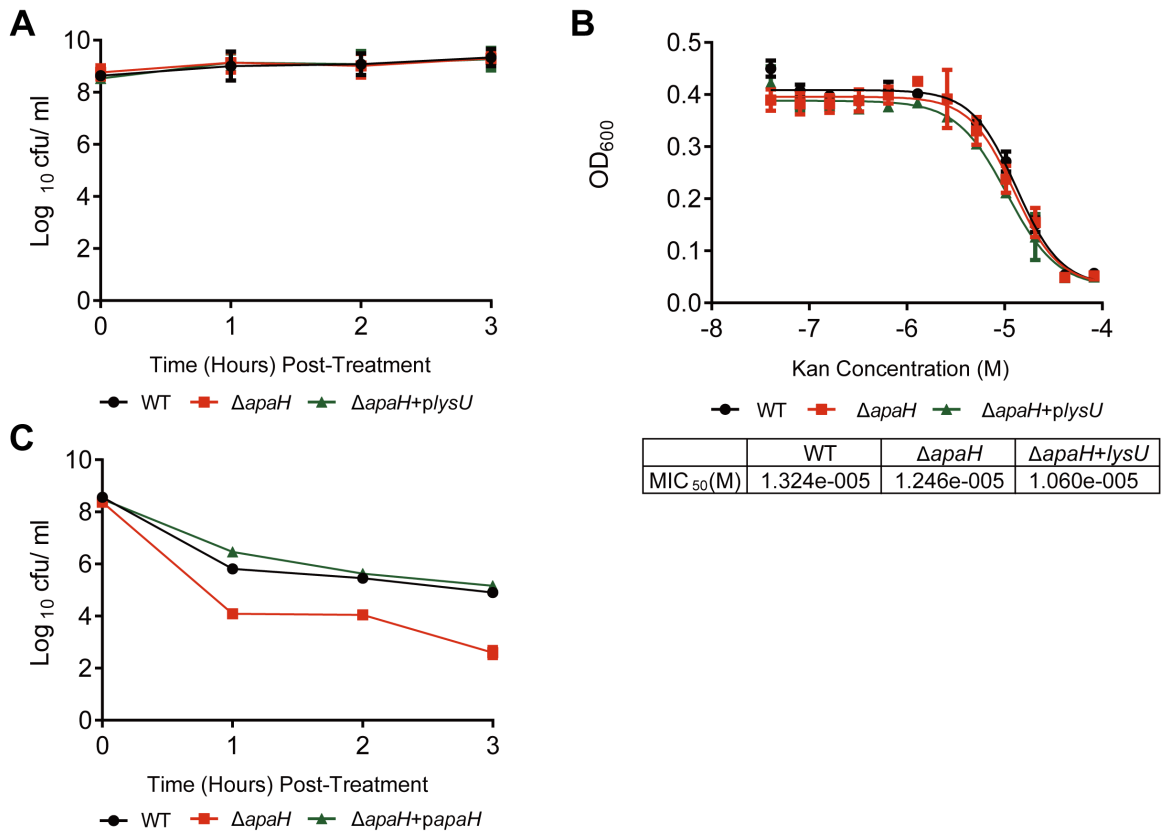

**Fig. S3. Ap4A contributes to aminoglycoside killing of *E. coli*.** (A) Growth curves for WT,  $\Delta apaH$  and  $\Delta apaH+plysU$  as measured by CFU counting. (B) Growth inhibition of WT,  $\Delta apaH$  and  $\Delta apaH+plysU$  caused by kanamycin. The minimum inhibitory concentration (MIC<sub>50</sub>) of each strain is shown. (C) Survival of WT,  $\Delta apaH$ , and its complement ( $\Delta apaH+papaH$ ) upon treatment with 100  $\mu$ g/ml kanamycin. Sample aliquots were harvested at 1, 2, and 3 hours for CFU enumeration. WT and  $\Delta apaH$  both contain the pBAD24 empty plasmid. Each point represents the mean  $\pm$  SD from one representative experiment in triplicate. At least three biological replicates were performed.

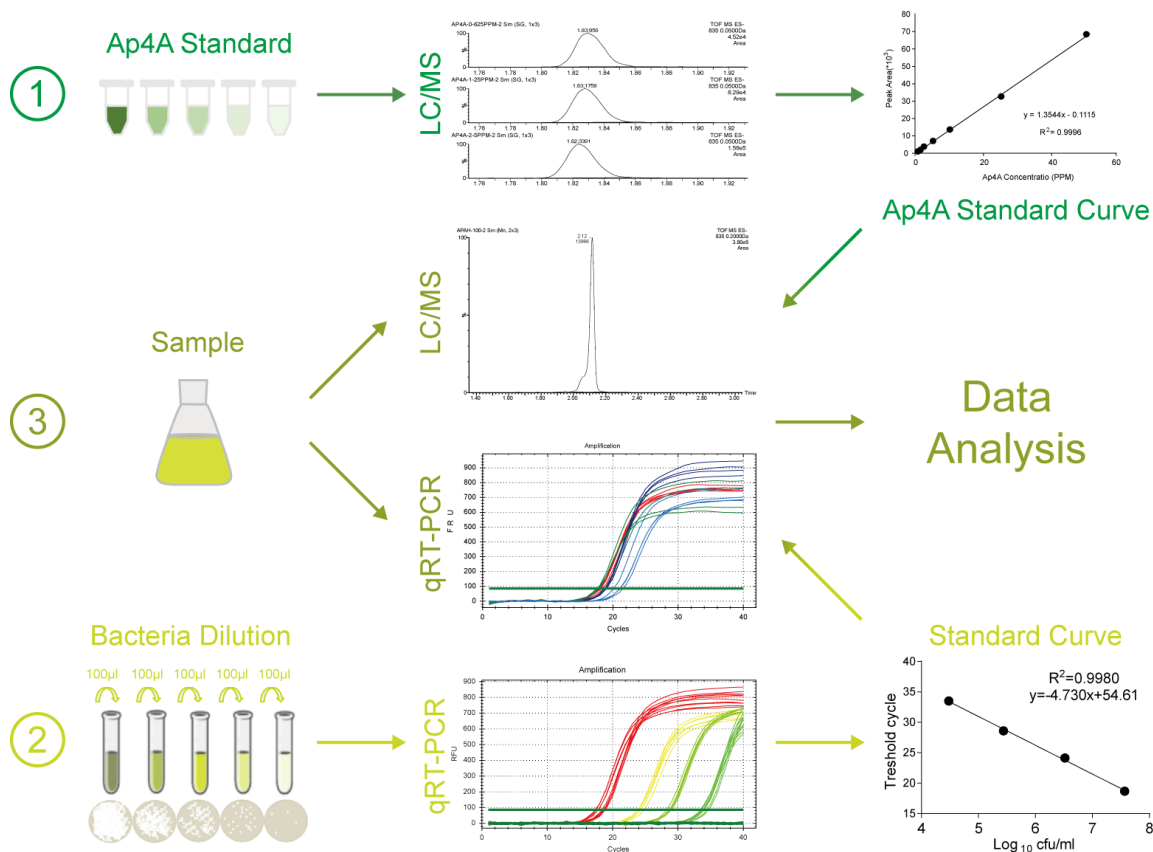

**Fig. S4. Schematic illustration of the procedure to normalize the measured Ap4A concentration in each bacterial sample.** ① An Ap4A standard curve is built by plotting the area under the curve measured by UPLC/ESI-TOF/MS against its concentration. A linear relationship over a concentration of 0.125  $\mu\text{M}$  to 50  $\mu\text{M}$  is shown. The regression equation of Ap4A was  $y = 1.3544x - 0.1115$ , and the correlation coefficient ( $R^2$ ) was 0.9996, indicating a good linearity. ② *E. coli* WT were grown in LB medium at 37°C to  $\text{OD}_{600} = 0.5$ . Ten-fold serial dilutions were conducted and divided into two parts: 1 ml sample was used to measure the level of *rpoB* gene by qRT-PCR; another 1 ml of the same sample was used for CFU counting (diluted accordingly if necessary). The Ct value for each sample was then used to build a stand curve of the CFU number of each samples. ③ The measured Ct value of *rpoB* gene in the antibiotic treated bacterial sample was matched to the standard curve to estimate the CFU of the samples. The Ap4A concentration from UPLC/ESI-TOF/MS was normalized based on the estimated bacterial CFU.

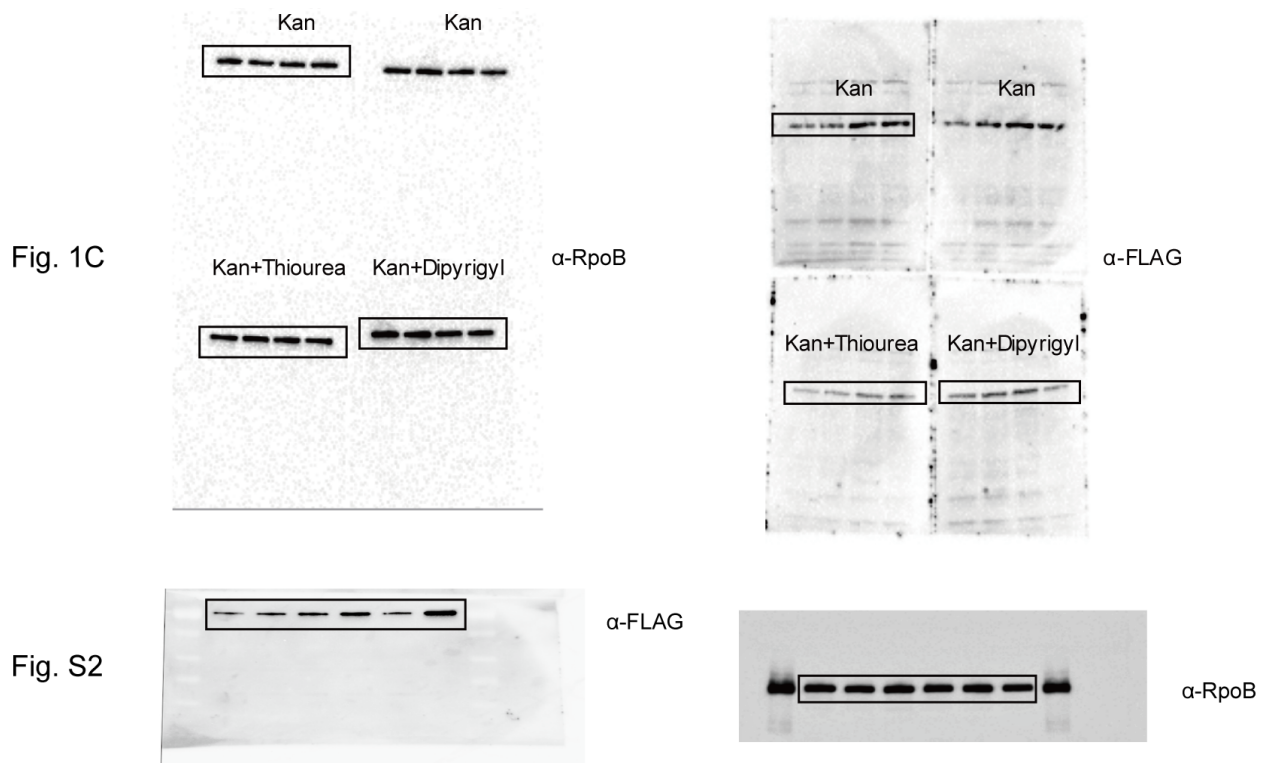

**Fig. S5.** Original image of the Western blot analysis in this study.

**Table S1. The 26 ions with the most prominent increase or decrease in abundance in *E. coli* treated with kanamycin**

| Metabolite No. | Metabolite Matched                                        | MS (Da)  | RT (min) | VIP     | Increase or decrease |
|----------------|-----------------------------------------------------------|----------|----------|---------|----------------------|
| M1             | Acetyl-CoA                                                | 808.1458 | 2.07     | 28.9433 | ↓                    |
| M2             | Coenzyme A                                                | 766.1304 | 1.99     | 27.6813 | ↓                    |
| M3             | Glycyl-D-tyrosyl-D-phenylalanyl-D-phenylalanyl-D-tyrosine | 730.2789 | 2.05     | 18.1724 | ↑                    |
| M4             | Succinyl-CoA                                              | 866.1411 | 1.98     | 17.1395 | ↓                    |
| M5             | NADH                                                      | 664.1287 | 1.62     | 15.2196 | ↓                    |
| M6             | Unknown                                                   | 809.1478 | 2.06     | 15.092  | ↓                    |
| M7             | (Methylenecyclopropyl)acetyl-CoA                          | 860.2475 | 1.74     | 13.0732 | ↑                    |
| M8             | Unknown                                                   | 786.1920 | 1.97     | 12.997  | ↑                    |
| M9             | NADP                                                      | 742.1007 | 1.74     | 12.0936 | ↑                    |
| M10            | 2,3-(Di-glutathion-S-yl)-1,4-naphthoquinone               | 767.1369 | 1.92     | 11.4878 | ↓                    |
| M11            | FAD                                                       | 784.1832 | 2.09     | 11.3095 | ↑                    |
| M12            | Unknown                                                   | 731.2823 | 2.05     | 10.7593 | ↑                    |
| M13            | Ap4A                                                      | 835.0794 | 2.04     | 10.6579 | ↑                    |
| M14            | PS(O-20:0/22:0)                                           | 860.7498 | 1.75     | 10.5657 | ↑                    |
| M15            | UDP-N-acetylmuramate                                      | 678.1247 | 1.81     | 10.3167 | ↑                    |
| M16            | Unknown                                                   | 810.1467 | 2.07     | 9.91576 | ↓                    |
| M17            | Unknown                                                   | 720.1571 | 1.71     | 8.92531 | ↓                    |
| M18            | Dephospho-CoA                                             | 686.1665 | 1.93     | 8.69693 | ↑                    |
| M19            | Unknown                                                   | 866.1612 | 1.75     | 7.79572 | ↑                    |
| M20            | Unknown                                                   | 665.1322 | 1.62     | 7.55813 | ↓                    |
| M21            | L-Asparaginyl-L-tyrosyl-L-tyrosyl-L-tryptophyl-L-serine   | 730.2592 | 1.79     | 7.08896 | ↓                    |
| M22            | Unknown                                                   | 867.1478 | 1.93     | 6.75062 | ↓                    |
| M23            | Unknown                                                   | 687.1701 | 1.93     | 4.64844 | ↑                    |
| M24            | Unknown                                                   | 768.1457 | 1.64     | 3.40754 | ↑                    |
| M25            | Unknown                                                   | 766.5044 | 1.57     | 3.12319 | ↑                    |
| M26            | Unknown                                                   | 788.1308 | 1.67     | 2.96498 | ↑                    |

Note: MS. Molecular Mass; RT: retention time; VIP, Variable importance in the projection; ↓ denote decrease and ↑ denote increase in respective metabolite.

**Table S2. Bacterial strains used in this study**

| <b>Name</b>                         | <b>Description</b>                                                                                                                                     | <b>Reference/Source</b> |
|-------------------------------------|--------------------------------------------------------------------------------------------------------------------------------------------------------|-------------------------|
| MG1655                              | Wild type <i>Escherichia coli</i> , WT                                                                                                                 | ATCC 700926             |
| MC1061 $\lambda$ pir                | <i>thi thr-1 leu-6 proA2 his-4 argE2 lacY1 galK2 ara-14 xy15 supE44 pir</i>                                                                            | (1)                     |
| DH5 $\alpha$                        | <i>fhuA2 <math>\Delta</math>(argF-lacZ)U169 phoA glnV44 <math>\Phi</math>80 <math>\Delta</math>(lacZ)M15 gyrA96 recA1 relA1 endA1 thi-1 hsdR17 pir</i> | (2)                     |
| WT+ <i>papaH</i>                    | MG1655 with <i>papaH</i>                                                                                                                               | This study              |
| $\Delta$ <i>apaH</i>                | MG1655; in-frame deletion of <i>apaH</i> (deleting amino acids from 1 to 280)                                                                          | This study              |
| $\Delta$ <i>apaH</i> + <i>plysU</i> | $\Delta$ <i>apaH</i> with <i>plysU</i>                                                                                                                 | This study              |
| $\Delta$ <i>apaH</i> + <i>papaH</i> | $\Delta$ <i>apaH</i> with <i>papaH</i>                                                                                                                 | This study              |
| <i>lysU::flag</i>                   | MG1655, LysU in-frame tagged with FLAG tag                                                                                                             | This study              |
| $\Delta$ <i>apaH</i> +pE264Q        | $\Delta$ <i>apaH</i> with pE264Q                                                                                                                       | This study              |
| WT AB                               | <i>Acinetobacter baumannii</i> ATCC17978, wild type                                                                                                    | ATCC17978               |
| $\Delta$ <i>apaH</i> _AB            | <i>A. baumannii</i> ATCC17978, in-frame deletion of <i>apaH</i> (deleting amino acids from 1 to 280)                                                   | This study              |
| WT PA                               | <i>Pseudomonas aeruginosa</i> PAO1, wild type                                                                                                          | (3)                     |
| $\Delta$ <i>apaH</i> PA             | <i>P. aeruginosa</i> PAO1, in-frame deletion of <i>apaH</i>                                                                                            | This study              |



**Table S3. Plasmids used in this study**

| <b>Name</b>                    | <b>Description</b>                                                                                                           | <b>Source</b> |
|--------------------------------|------------------------------------------------------------------------------------------------------------------------------|---------------|
| pDS132                         | pCVD442 modified suicide plasmid, <i>pir</i> dependent, <i>sacB</i> , $Cm^R$ ,                                               | (4)           |
| pEXG2                          | ColE1 <i>mob</i> <sup>+</sup> , <i>sacB</i> suicide vector ( $Gm^R$ )                                                        | (5)           |
| pBAD24                         | pBR322/ColE1 modified expression plasmid, <i>araC</i> , $Amp^R$                                                              | (6)           |
| pPSV37                         | <i>colE1</i> origin, <i>gentR</i> , PA origin, <i>oriT</i> , <i>lacUV5</i> promoter, <i>lacI<sup>q</sup>lacI<sup>a</sup></i> | (7)           |
| pDS132 $\Delta$ <i>apaH</i>    | pDS132 with flanking regions of <i>apaH</i> for deleting <i>apaH</i> of <i>E. coli</i> from amino acids 1 to 280             | This study    |
| pDS132- <i>lysU::flag</i>      | pDS132 with a fragment for construction of LysU:: FLAG                                                                       | This study    |
| <i>papaH</i>                   | pBAD24 with wild-type <i>apaH</i>                                                                                            | This study    |
| <i>plysU</i>                   | pBAD24 with wild-type <i>lysU</i> , arabinose inducible                                                                      | This study    |
| <i>pE264Q</i>                  | pBAD24 with E264Q mutant of LysU                                                                                             | This study    |
| pEXG2 $\Delta$ <i>apaH</i> _AB | pEXG2 with flanking regions of <i>apaH</i> for deleting <i>apaH</i> of <i>A. baumannii</i> from amino acids 1 to 280         | This study    |
| pEXG2 $\Delta$ <i>apaH</i> _PA | pEXG2 with flanking regions of <i>apaH</i> , deleting <i>apaH</i> of <i>P. aeruginosa</i>                                    | This study    |

**Table S4. Primers used in this study**

| Name                       | Sequence (5'→3')                                      | Description                                                             |
|----------------------------|-------------------------------------------------------|-------------------------------------------------------------------------|
| RT- <i>rpoB</i> -for       | CCTGCGCAAAGGTATGCCAA                                  | For qRT-PCR of <i>rpoB</i>                                              |
| RT- <i>rpoB</i> -rev       | TACCGGACGCTCGAACTGTT                                  |                                                                         |
| <i>lysU</i> -flag-CH1-for  | GTCAAACGTTTGTGTCCG                                    | For confirmation of <i>lysU::flag</i>                                   |
| <i>lysU</i> -flag-CH1-rev  | GTCGTCATCGTCTTTGTAGTC                                 |                                                                         |
| <i>lysU</i> -flag-CH2-for  | CAAAGACGATGACGACAAG                                   |                                                                         |
| <i>lysU</i> -flag-CH2-rev  | GCAAATCGCTGAAATTGTC                                   |                                                                         |
| <i>lysU</i> -flag-for      | GGATCGATCCTCTAGGAAACCCCGATGATGCAG                     | For construction of <i>lysU::flag</i>                                   |
| <i>lysU</i> -flag-rev      | ATGCGGTACCTCTAGATGTCGATGAAAGCCTGA                     |                                                                         |
| <i>lysU</i> -flag-int-rev  | TTACTTGTGTCATCGTCTTTGTAGTCTTTCTGTGGGCGCATCG           |                                                                         |
| <i>lysU</i> -flag-int-for  | GACTACAAAGACGATGACGACAAGTAAATTTCACTT<br>TAATGAACGAAGC |                                                                         |
| <i>delapaH</i> -for        | GGATCGATCCTCTAGACCTGCCTTATAACATCTCC                   | For construction of <i>apaH</i> deletion mutant                         |
| <i>delapaH</i> -int-rev    | GCTGTGTTTACGCCATATTCTTTTAATGAA                        |                                                                         |
| <i>delapaH</i> -int-for    | GAATATGGCGTAAACACAGCCTGATATAGG                        |                                                                         |
| <i>delapaH</i> -rev        | ATGCGGTACCTCTAGTTAAGTGAGATCATTACCGA                   |                                                                         |
| <i>delapaH</i> -CH1-for    | GCCGAGAAAATGGGTCAG                                    | For confirmation of <i>apaH</i> deletion                                |
| <i>delapaH</i> -CH1-rev    | TCTTATCCGGCCTTCCTA                                    |                                                                         |
| <i>delapaH</i> -CH2-for    | CTTTCAGCATCGACATTC                                    |                                                                         |
| <i>delapaH</i> -CH2-rev    | ACAGTATTGTGTCTGCCA                                    |                                                                         |
| BAD <i>papaH</i> -for      | GAGGAATTCACCATGGCGACATACCTTATTGGC                     | For construction of <i>papaH</i>                                        |
| BAD <i>papaH</i> -rev      | GCAGGTCGACTCTAGTGTTTAAGACGCCGCCGCTT                   |                                                                         |
| BAD <i>lysU</i> -for       | GAGGAATTCACCATGTCTGAACAAGAAACAC                       | For construction of <i>plysU</i>                                        |
| BAD <i>lysU</i> -rev       | GCAGGTCGACTCTAGTTATTTCTGTGGGCGCA                      |                                                                         |
| E264Q <i>lysU</i> -int-rev | ACCTTGATTACGGAAGTTACG                                 | For construction of LysU 264 amino acid point mutant pE264Q             |
| E264Q <i>lysU</i> -int-for | ATCAAGGTATTTCTGTTCGC                                  |                                                                         |
| DelapaHAB-for              | CATAAATGTAAAGCAATGTCGCTGTCGATTTAGC                    | For construction of <i>apaH</i> deletion mutant in <i>A. baumannii</i>  |
| DelapaHAB-int-rev          | CTTTTTTTTAGTCACCAGCAAACCAGATAA                        |                                                                         |
| DelapaHAB-int-for          | TGCTGGTGACTAAAAAAAAGCCGCTGAAACGG                      |                                                                         |
| DelapaHAB-rev              | TTAAGGTACCGAATTTATGCTTTGCCAGCATTAGT                   |                                                                         |
| DelapaHAB-CH1-for          | GGGTTTTGGTGAAGCAATCA                                  | For confirmation of <i>apaH</i> deletion in <i>A. baumannii</i>         |
| DelapaHAB-CH1-rev          | TAATCAGATCTGGATTCGCC                                  |                                                                         |
| DelapaHAB-CH2-for          | AACTCTTGCAGAGTTTGTGG                                  |                                                                         |
| DelapaHAB-CH2-rev          | GGTTGCTTTAGCCATACCTT                                  |                                                                         |
| DelapaH-3'fragment for     | CCCGTGGAATTAATTAAGGTACCGTGCGCCCTTT<br>CGCATC          | For construction of <i>apaH</i> deletion mutant in <i>P. aeruginosa</i> |
| DelapaH-3'fragment rev     | AACTCGAGCCGCAAGCATGCTGAAGTAGACCGCCA<br>TCAGTGCAGC     |                                                                         |
| DelapaH-5'fragment for     | TTCAGCATGCTTGC GGCTCGAGTTACGCCCGCATGA<br>ATCCCCGGC    |                                                                         |

|                            |                                              |                                                                        |
|----------------------------|----------------------------------------------|------------------------------------------------------------------------|
| DelapaH-<br>5'fragment rev | GAGCCGGAAGCATAAATGTAAAGCAGGCTCGCCGA<br>TCGCC |                                                                        |
| DelapaH_for                | TCGGCAGCATGCGCGGCAGCT                        | For confirmation<br>of <i>apaH</i> deletion<br>in <i>P. aeruginosa</i> |
| DelapaH_rev                | ACCACCTGGGCGCCGTTTTTCG                       |                                                                        |

## References

1. Rubirés X, Saigi, F., Piqué, N., Climent, N., Merino, S., Albertí, S., Tomás, J. M., and Regué, M. (1997) A Gene (*wbbL*) from *Serratia marcescens* N28b (O4) Complements the *rfb-50* Mutation of *Escherichia coli* K-12 Derivatives. *Journal of Bacteriology* 179:7581-7586.
2. Hanahan D (1983) Studies on transformation of *Escherichia coli* with plasmids. *J. Mol. Biol.* 166:557-580.
3. Stover CK, *et al.* (2000) Complete genome sequence of *Pseudomonas aeruginosa* PAO1, an opportunistic pathogen. *Nature* 406(6799):959-964.
4. Philippe N, Alcaraz JP, Coursange E, Geiselmann J, & Schneider D (2004) Improvement of pCVD442, a suicide plasmid for gene allele exchange in bacteria. *Plasmid* 51(3):246-255.
5. Rietsch A, Vallet-Gely I, Dove SL, & Mekalanos JJ (2005) ExsE, a secreted regulator of type III secretion genes in *Pseudomonas aeruginosa*. *Proc Natl Acad Sci U S A* 102(22):8006-8011.
6. Guzman LM, Belin D, Carson MJ, & Beckwith J (1995) Tight regulation, modulation, and high-level expression by vectors containing the arabinose PBAD promoter. *J Bacteriol* 177(14):4121-4130.
7. Lee PC, Stopford CM, Svenson AG, & Rietsch A (2010) Control of effector export by the *Pseudomonas aeruginosa* type III secretion proteins PcrG and PcrV. *Mol Microbiol* 75(4):924-941.
